# Supplementary material
Source: HighWire-hosted journal article supplement (https://erj.ersjournals.com/content/50/1/1700217)

## **SUPPLEMENTAL MATERIAL**

Long Term Outcomes of Dasatinib-induced Pulmonary Arterial Hypertension : A population-based study

Jason Weatherald, MD; Marie-Camille Chaumais, PharmD, PhD; Laurent Savale, MD, PhD; Xavier Jaïs, MD; Andrei Seferian, MD; Matthieu Canuet, MD; Hélène Bouvaist, MD; Pascal Magro, MD; Anne Bergeron, MD, PhD; Christophe Guignabert, PhD; Olivier Sitbon, MD, PhD; Gérald Simonneau, MD; PhD; Marc Humbert, MD, PhD; David Montani, MD, PhD

Pages: 8

Contents

1. Supplemental Table S1 p. 2-3
2. Supplemental Table S2 p. 4
3. Supplemental Figure S1 p. 5-7
4. Supplemental Figure S2 p. 8

Supplemental Table S1 - Hemodynamic parameters at the time of PAH diagnosis

|     | mPAP,<br><i>mmHg</i>                                                                                  | RAP,<br><i>mmHg</i> | PCWP,<br><i>mmHg</i> | CO,<br><i>L/min</i> | CI,<br><i>L/min/m<sup>2</sup></i> | PVR,<br><i>mmHg/L/min</i> | SvO <sub>2</sub> ,<br><i>%</i> | Acute vasodilator response #    |
|-----|-------------------------------------------------------------------------------------------------------|---------------------|----------------------|---------------------|-----------------------------------|---------------------------|--------------------------------|---------------------------------|
| 1   | 47                                                                                                    | 14                  | 13                   | 5.6                 | 2.9                               | 6.1                       | 66                             | Yes ( <i>mPAP:36, CI: 2.9</i> ) |
| 2   | 59                                                                                                    | 13                  | 11                   | 6.5                 | 4.0                               | 7.4                       | 63                             | No ( <i>mPAP:59, CI: 6.4</i> )  |
| 3 * | 30                                                                                                    | 5                   | 8                    | 6.7                 | 4.7                               | 3.3                       | 72                             | No ( <i>mPAP:27, CI: 6.9</i> )  |
| 4   | <i>PH was screened by echocardiography and confirmed by RHC 6 weeks after withdrawal of dasatinib</i> |                     |                      |                     |                                   |                           |                                |                                 |
| 5   | 49                                                                                                    | 6                   | 10                   | 8.9                 | 4.8                               | 4.4                       | 65                             | No ( <i>mPAP:50, CI: 5.1</i> )  |
| 6   | 49                                                                                                    | 24                  | 8                    | 3.3                 | 1.8                               | 12.4                      | 55                             | No ( <i>mPAP:47, CI: 2.0</i> )  |
| 7   | 38                                                                                                    | 6                   | 11                   | 4.8                 | 3.2                               | 5.6                       | 72                             | No ( <i>mPAP:31, CI: 2.7</i> )  |
| 8   | 37                                                                                                    | 6                   | 3                    | 3.3                 | 1.9                               | 10.3                      | 54                             | No ( <i>mPAP:39, CI: 2.4</i> )  |
| 9   | 45                                                                                                    | 4                   | 10                   | 6.4                 | 4.0                               | 5.4                       | 74                             | No ( <i>mPAP:38</i> )           |
| 10  | 70                                                                                                    | 12                  | 6                    | 2.3                 | 1.4                               | 27.3                      | 44                             | -                               |
| 11  | 40                                                                                                    | 4                   | 6                    | 6.3                 | 2.9                               | 5.3                       | 64                             | No ( <i>mPAP:37</i> )           |
| 12  | 56                                                                                                    | 12                  | 8                    | 5.8                 | 3.3                               | 8.3                       | -                              | No ( <i>mPAP:52</i> )           |
| 13  | 46                                                                                                    | 3                   | 12                   | 6.1                 | 3.0                               | 5.6                       | -                              | Yes ( <i>mPAP:35</i> )          |
| 14  | 40                                                                                                    | 8                   | 8                    | 9.1                 | 3.4                               | 9.4                       | 81                             | No ( <i>mPAP:31, CI:3.2</i> )   |
| 15  | 42                                                                                                    | 5                   | 12                   | 9.2                 | 4.0                               | 3.2                       | -                              | No                              |
| 16  | 57                                                                                                    | -                   | 23                   | 3.7                 | 2.0                               | 17.0                      | -                              | No ( <i>mPAP:56, CI:2.2</i> )   |
| 17  | 45                                                                                                    | 12                  | 13                   | 4.0                 | 2.6                               | 8.0                       | 59                             | No ( <i>mPAP:39, CI:2.7</i> )   |
| 18  | 42                                                                                                    | 3                   | 10                   | 5.3                 | 2.7                               | 6.0                       | 72                             | No                              |
| 19† | 50                                                                                                    | 6                   | 9                    | 8.1                 | 3.7                               | 5.1                       | -                              | -                               |

|    |    |    |    |     |     |     |    |    |
|----|----|----|----|-----|-----|-----|----|----|
| 20 | 34 | 7  | 9  | 6.7 | 3.8 | 3.7 | 65 | No |
| 21 | 52 | 20 | 18 | 5.3 | 3.3 | 6.4 | -  | -  |

mPAP: mean pulmonary artery pressure, RAP: right atrial pressure, PCWP: pulmonary capillary wedge pressure, CO: cardiac output, CI: cardiac index, PVR: pulmonary vascular resistance, SvO<sub>2</sub>: mixed venous oxygen saturation.

\* Severe clinical and hemodynamic impairment necessitated initial management in an intensive care unit with catecholamines; right-heart catheterization was performed after successful weaning of catecholamines two weeks following withdrawal of dasatinib.

# Acute vasodilator response was defined as a decrease in mPAP of  $\geq 10$  mmHg to reach an absolute value of  $< 40$  mmHg, associated with no change or an increase in CO.

‡ Dasatinib was discontinued 4 months prior to PAH diagnosis and baseline right heart catheterization.

Supplemental Table S2 - Comparison of patients according to treatment status

| Baseline Variables | Treatment<br>n = 11 | No Treatment<br>n = 10* | p-value |
|--------------------|---------------------|-------------------------|---------|
| NYHA (I/II/III/IV) | 0/2/4/5             | 0/3/6/1                 | 0.15    |
| 6MWD (m)           | 280 (0-510)         | 345 (0-660)             | 0.15    |
| mPAP               | 47 (34-70)          | 42 (30-59)              | 0.42    |
| CI                 | 2.9 (1.4-3.8)       | 4.0 (2.7-4.8)           | 0.007   |
| PVR                | 8.0 (3.7-27.3)      | 5.6 (3.2-9.4)           | 0.14    |
| Persistent PAH     | 4 (36%)             | 2 (25%)                 | 0.64    |

Continuous variables expressed as median (min-max range).

\*n=8 for hemodynamic variables

Supplemental Figure S1 - Evolution of haemodynamic variables and exercise capacity  
Individual changes at each follow-up visit are shown for A. mean pulmonary arterial pressure (mPAP), B. pulmonary vascular resistance (PVR) and C. 6-minute walk distance (6MWD). Follow-up time truncated at 56 months.

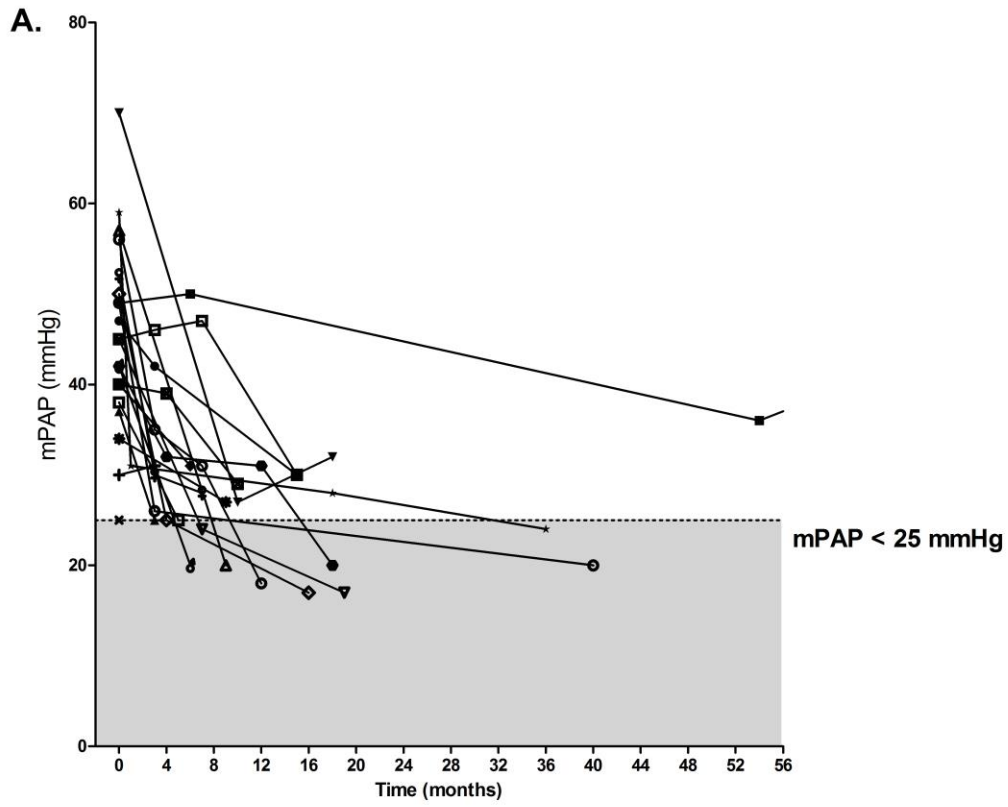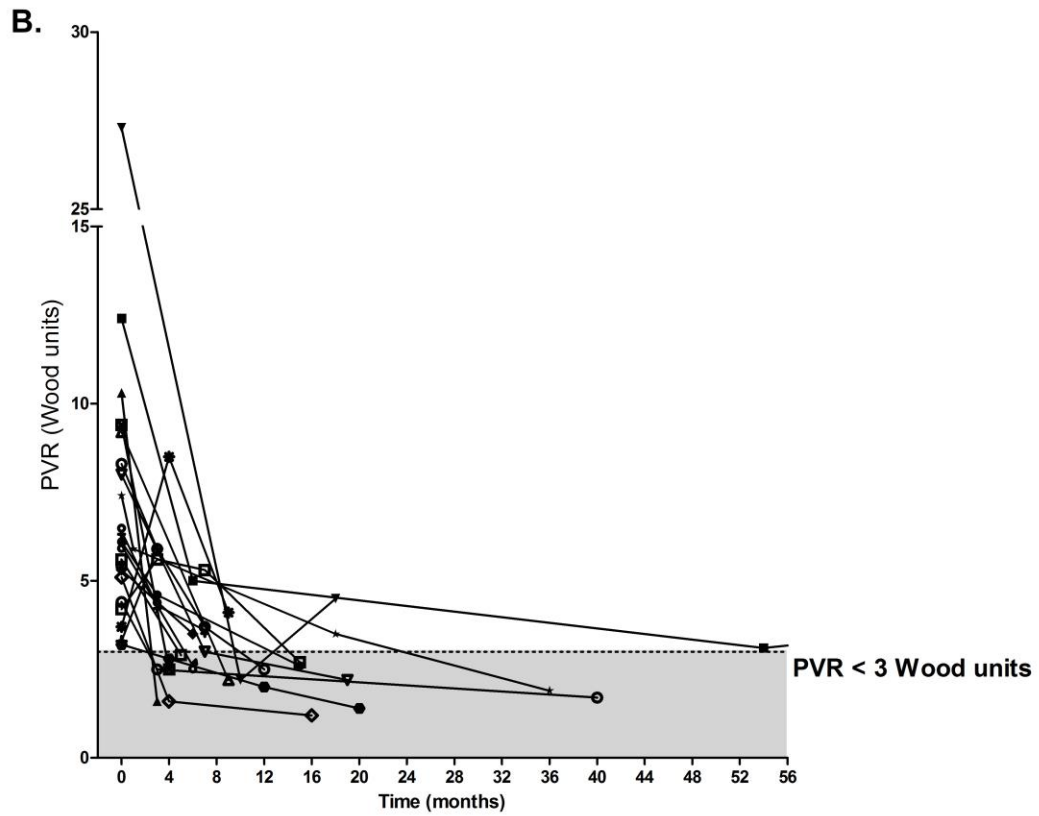

6MWD

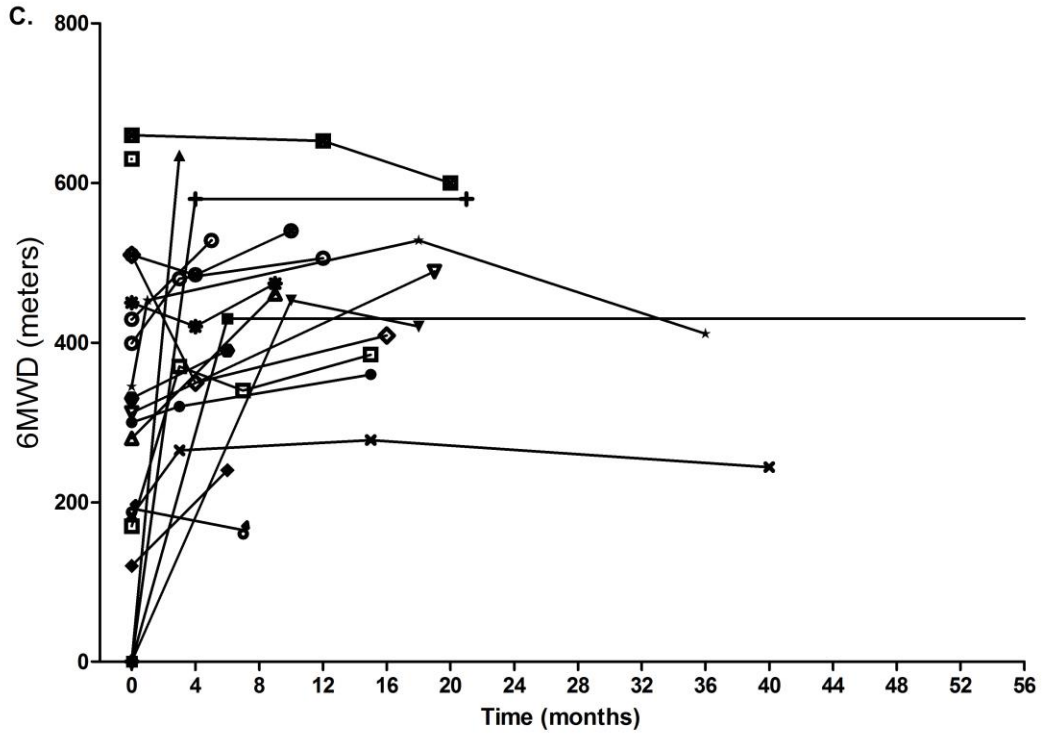

Supplemental Figure S2 - Individual changes in clinical and haemodynamic variables.

Individual changes from baseline to last evaluation for A. mean pulmonary arterial pressure (mPAP), B. pulmonary vascular resistance (PVR), C. cardiac index, D. 6-minute walk distance (6MWD). Patients who received PAH-specific therapy or calcium channel blockers (n=11) are represented in blue and patients who received no treatment (n=8) are represented in black.

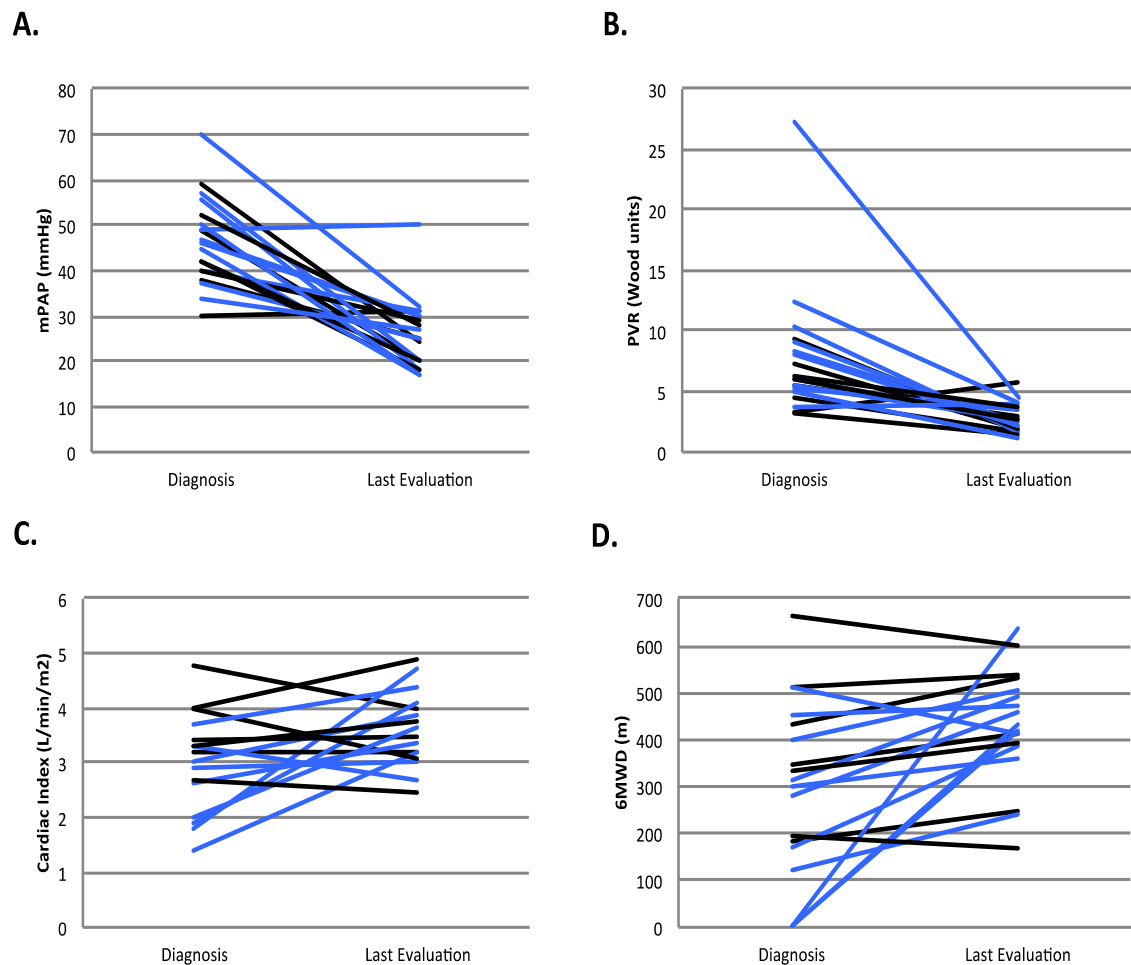

Supplement: inline-supplementary-material-1 [file inline-supplementary-material-1.pdf]
